# Supplementary material
Source: ML conference proceedings conference paper supplement (https://proceedings.mlr.press/v32/bai14.html)

---

## A Bayesian Framework for Online Classifier Ensemble Supplementary Materials

---

We plot as follows the error rate behavior between our method vs. the SGD baseline, with the growth of incoming samples, for all data sets tested in table 1 of our paper.

Figure 1. Error rate behavior - Perceptron

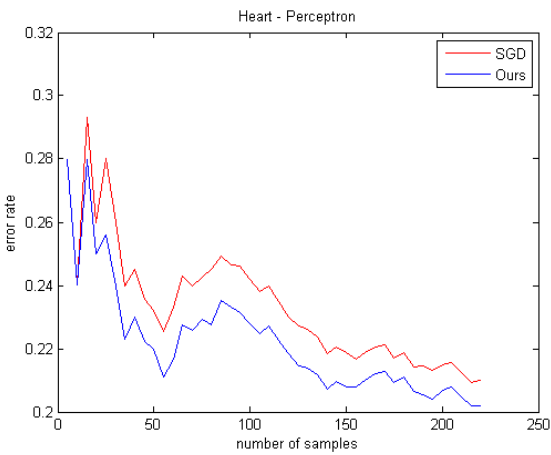

Figure 2. Error rate behavior - Naive Bayes

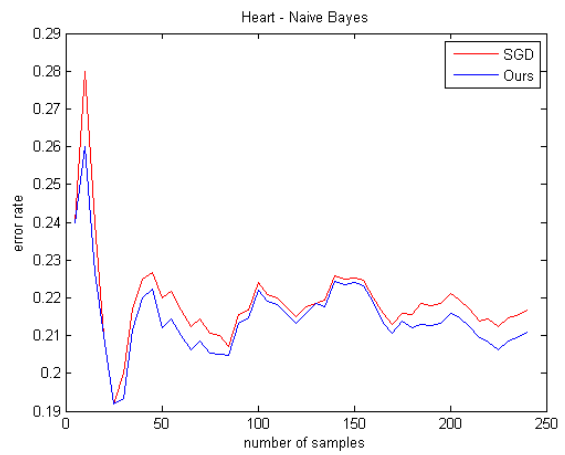

Figure 3. Error rate behavior - Perceptron

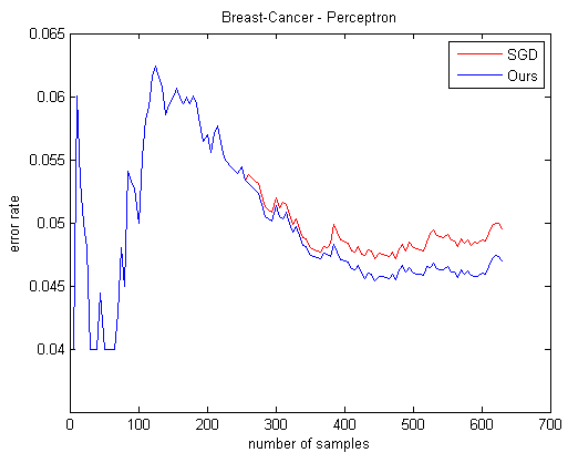

Figure 4. Error rate behavior - Naive Bayes

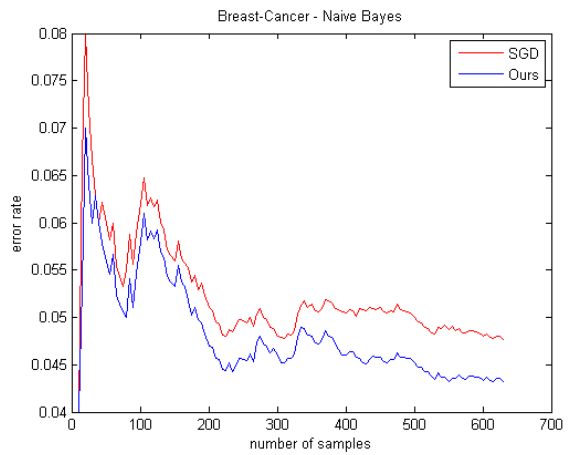

Figure 5. Error rate behavior - Perceptron

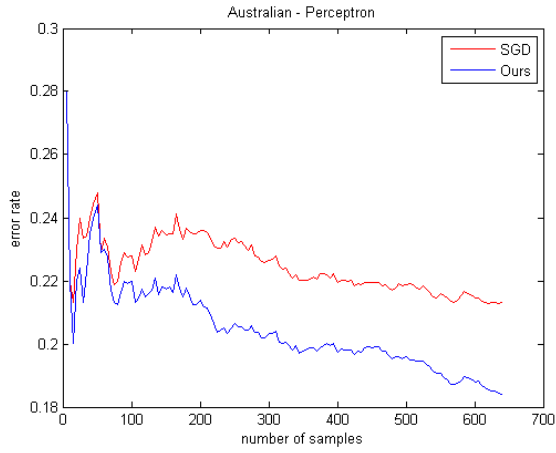

Figure 6. Error rate behavior - Naive Bayes

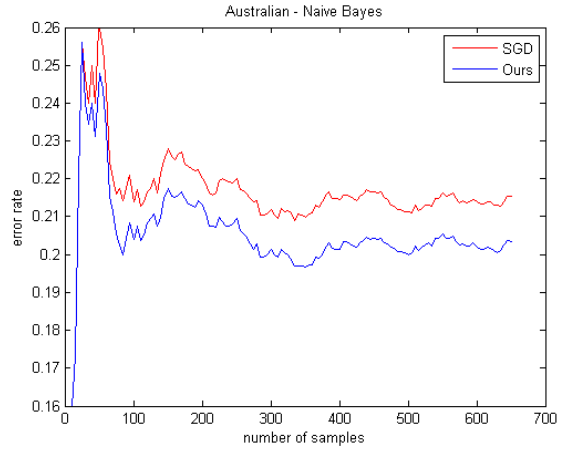

Figure 7. Error rate behavior - Perceptron

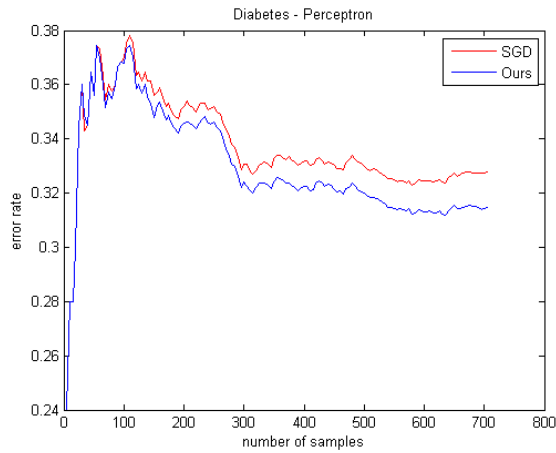

Figure 8. Error rate behavior - Naive Bayes

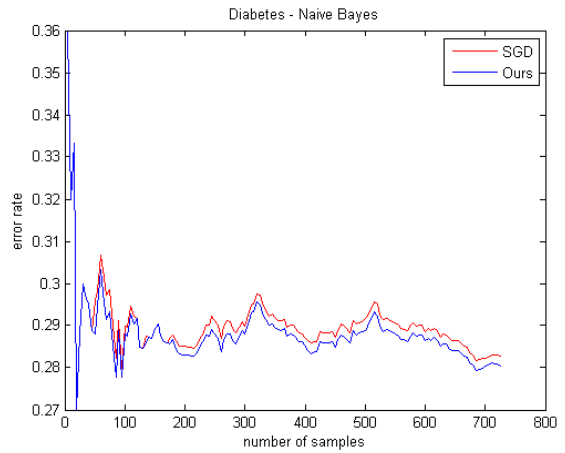

Figure 9. Error rate behavior - Perceptron

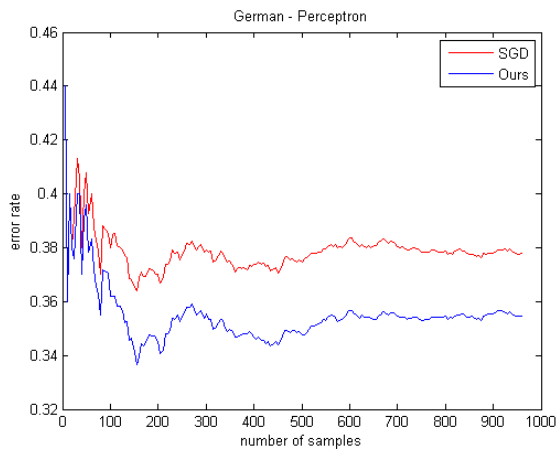

Figure 10. Error rate behavior - Naive Bayes

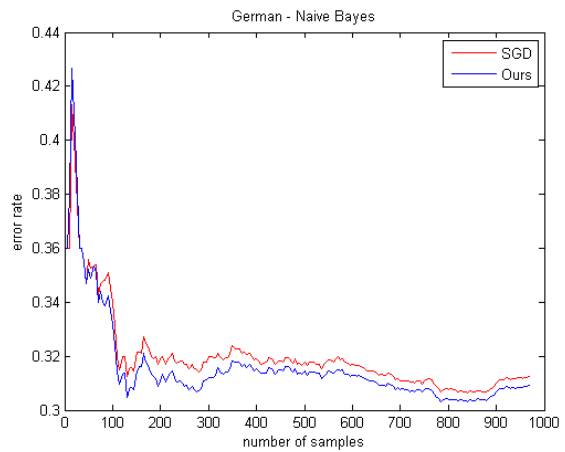

Figure 11. Error rate behavior - Perceptron

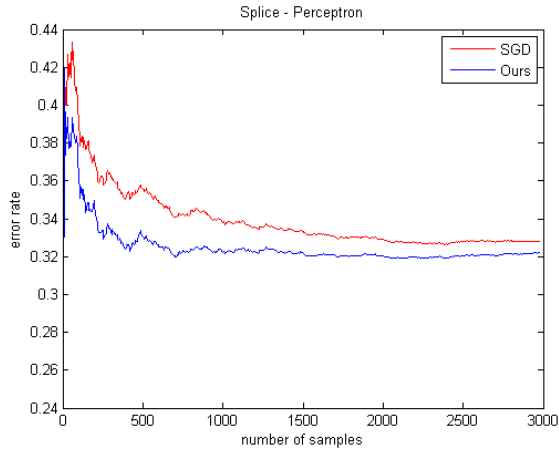

Figure 12. Error rate behavior - Naive Bayes

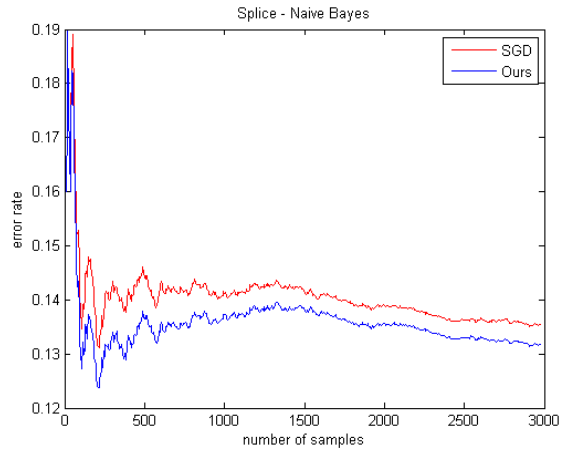

Figure 13. Error rate behavior - Perceptron

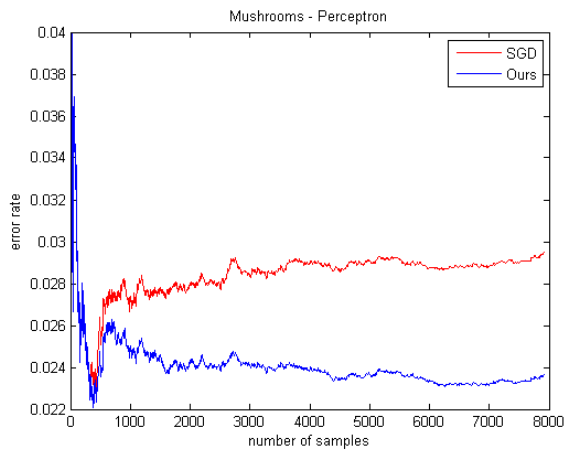

Figure 14. Error rate behavior - Naive Bayes

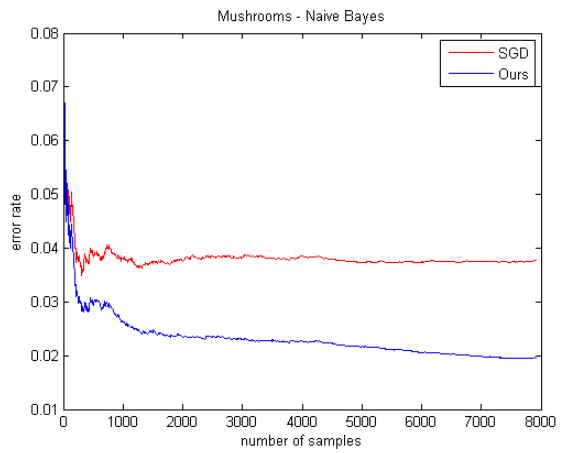

Figure 15. Error rate behavior - Perceptron

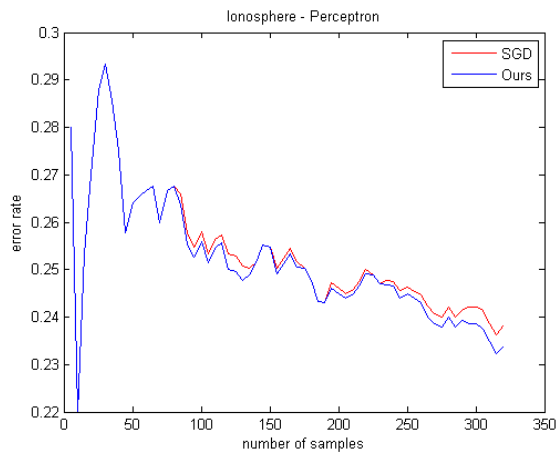

Figure 16. Error rate behavior - Naive Bayes

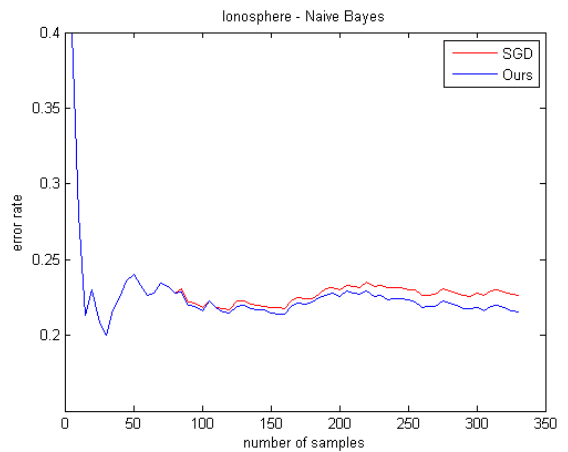

Figure 17. Error rate behavior - Perceptron

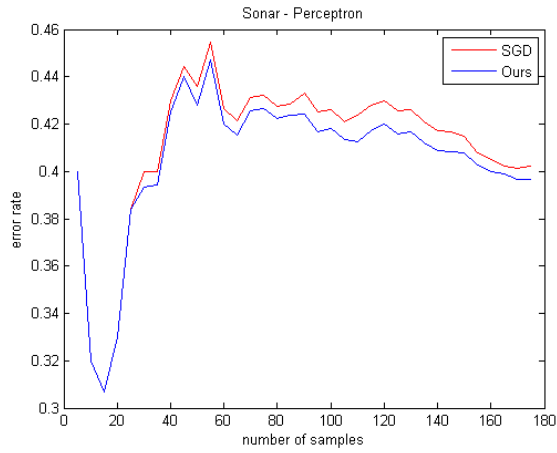

Figure 18. Error rate behavior - Naive Bayes

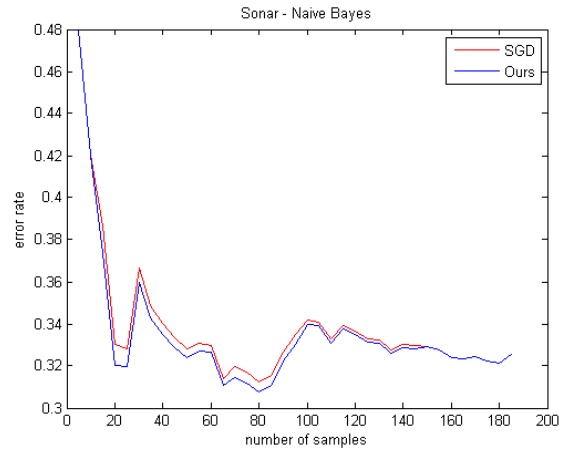

Figure 19. Error rate behavior - Perceptron

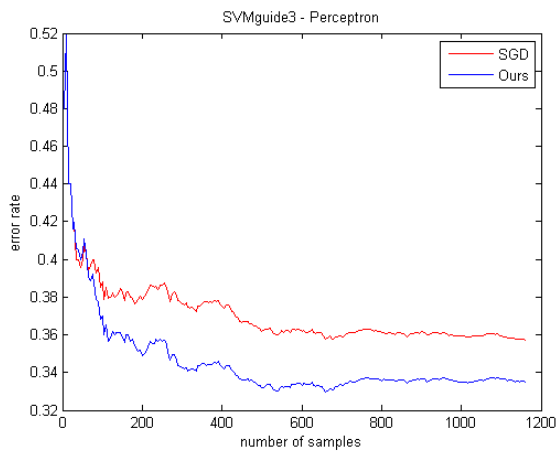

Figure 20. Error rate behavior - Naive Bayes

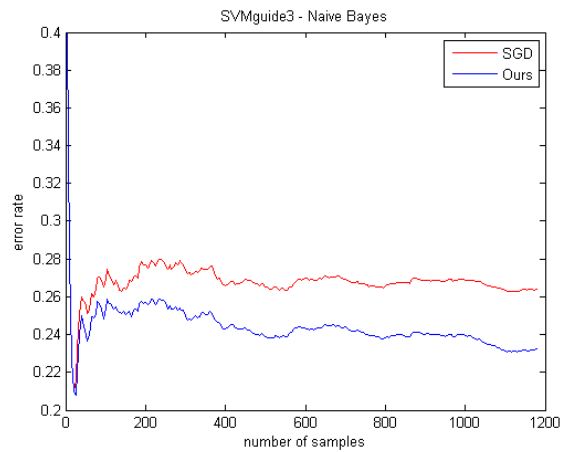

Supplement: Supplementary file 1 [file bai14-supp.pdf]
